# Supplementary material for: Stable Agrobacterium‐Mediated Transformation of Maritime Pine Based on Kanamycin Selection
Source: Hindawi journal article supplement (doi:10.1155/2013/681792), 2013-01-01

**Online Resource 1**

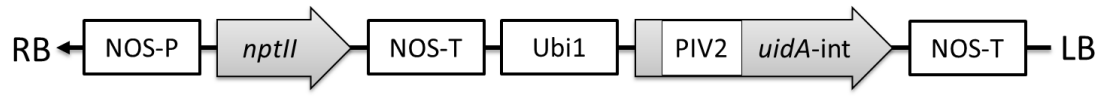

## Online Resource 2

**Online Resource 2** Primer sequences used for PCR amplification and Real Time PCR (qPCR).

| Gene                   | Amplicon length | Sequence (5' - 3')                             |
|------------------------|-----------------|------------------------------------------------|
| <i>Pips-C61</i> (qPCR) | 93 bp           | ACACGCAGGACACAATAC<br>CTGCTGCTGGTGATTTTG       |
| <i>uidA</i> (qPCR)     | 146 bp          | GCAAGCGCACTTACAGGCGA<br>ACGGCGTGACATCGGCTTCAA  |
| <i>nptII</i>           | 780 bp          | GAGGCTATTCGGCTATGACTG<br>ATCGGGAGCGGCGATACCGTA |
| <i>uidA</i>            | 1199 bp         | GGTGGGAAAGCGCGTTACAAG<br>GTTTACGCGTTGCTTCCGCCA |
| <i>virG</i>            | 200 bp          | AAGGTGAGCCGTTGAAACAC<br>ATCTCAAGCCCATCTTCACG   |

Online Resource 3

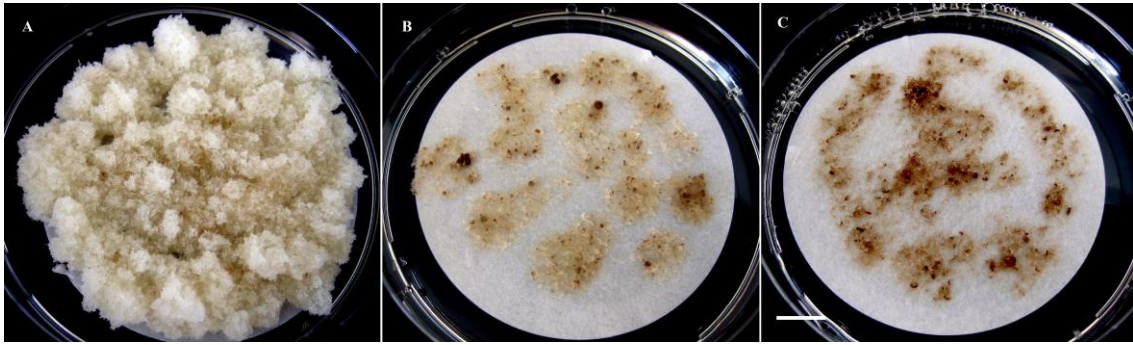

Online Resource 4

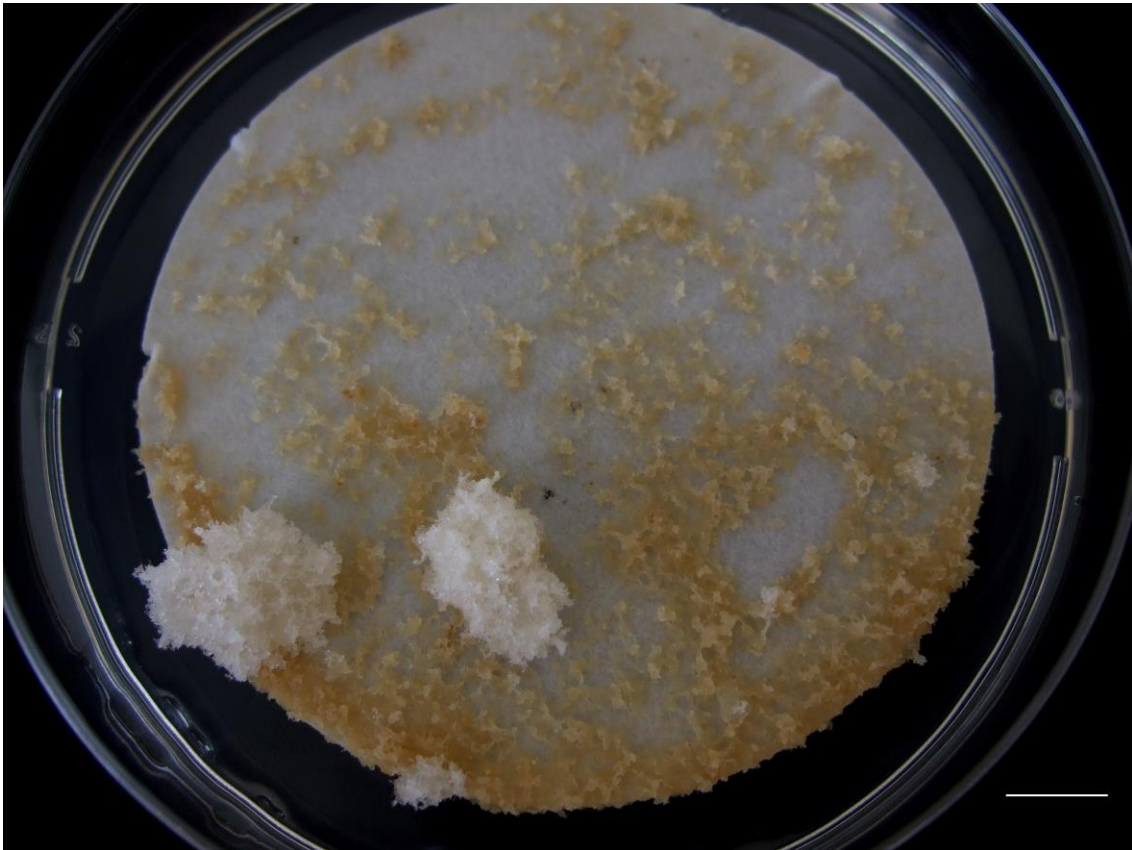

Online Resource 5

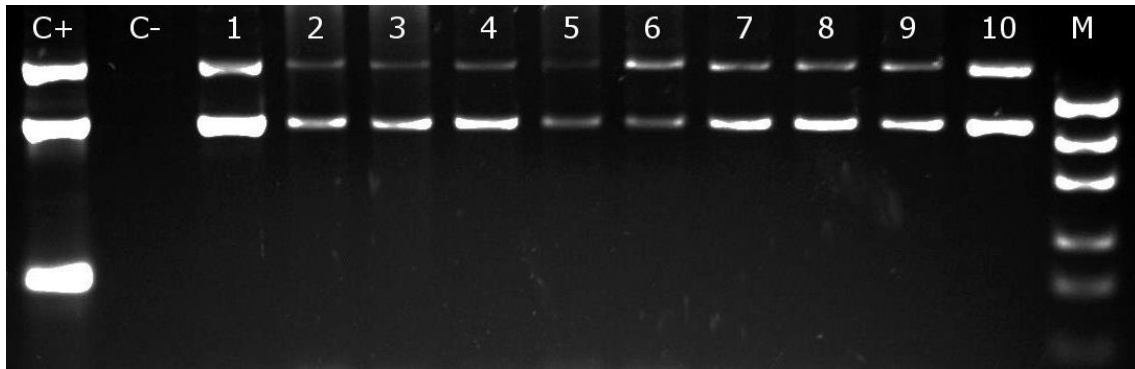

Online Resource 6

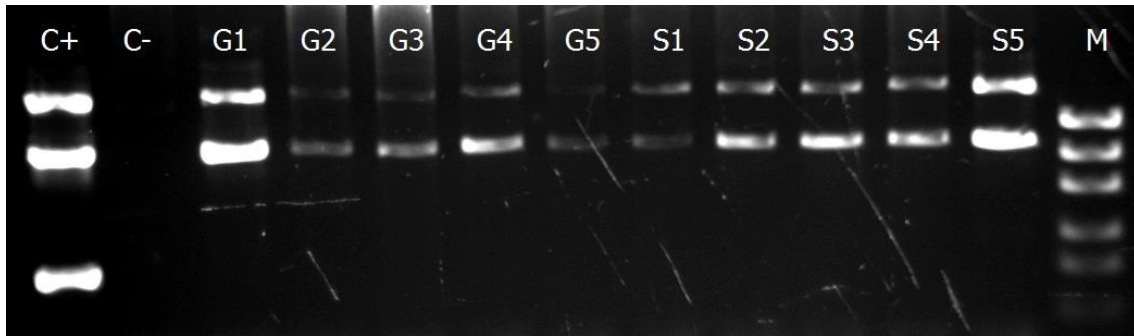

Supplement: f1 [file 681792.f1.pdf]
